# Supplementary material for: Multipeptide stimulated PBMCs generate TEM/TCM for adoptive cell therapy in multiple myeloma
Source: PubMed Central journal article supplement (PMC8487724; doi:10.18632/oncotarget.28067), 2021-09-28
Supplement: oncotarget-12-2051-s001.pdf [file oncotarget-12-2051-s001.pdf]

# Multipptide stimulated PBMCs generate T<sub>EM</sub>/T<sub>CM</sub> for adoptive cell therapy in multiple myeloma

## SUPPLEMENTARY MATERIALS

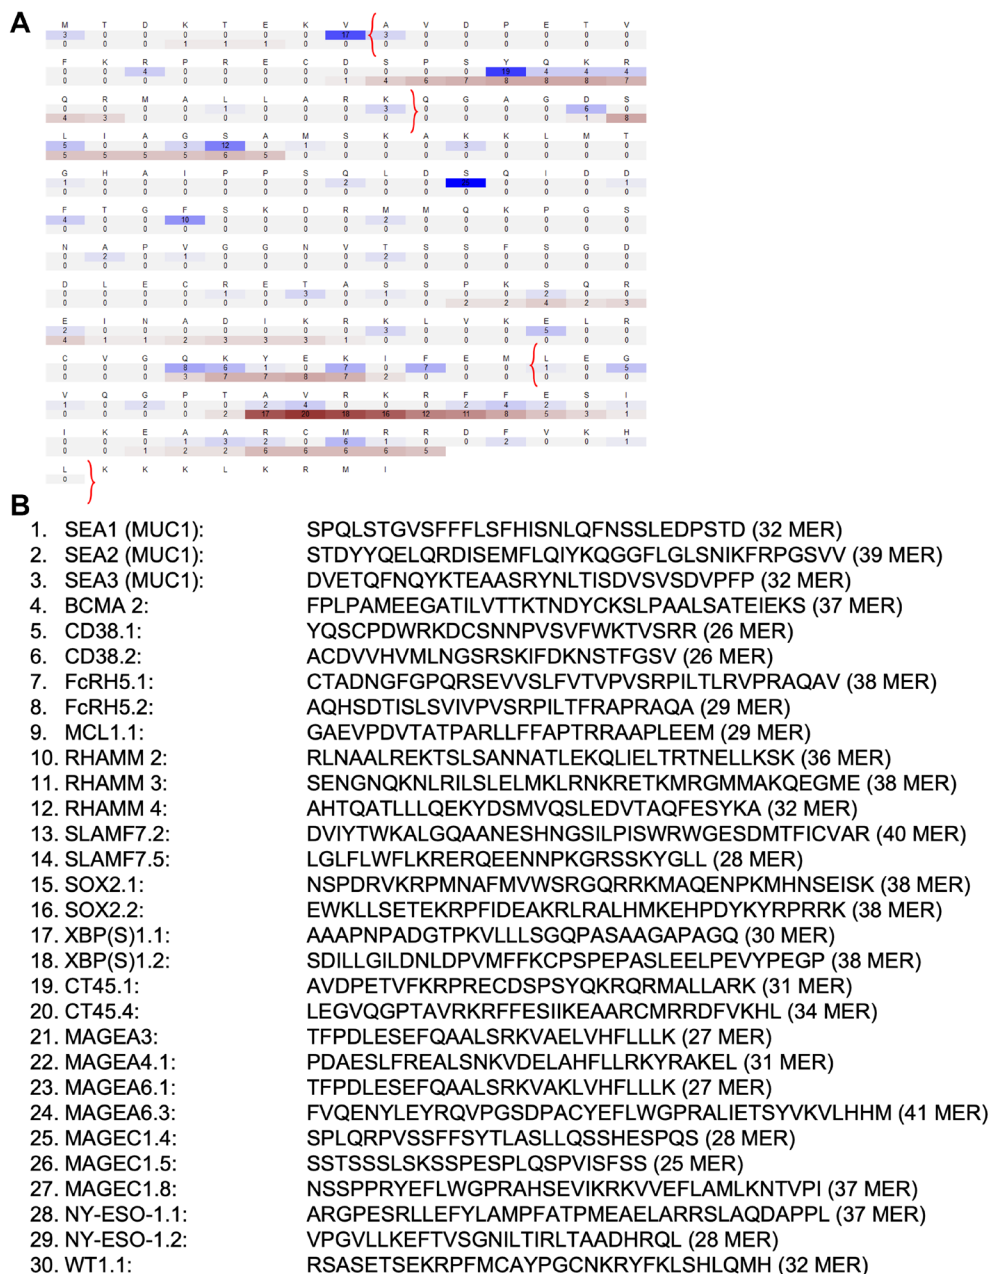

7

**Supplementary Figure 1: Synthetic peptides were designed for different antigens based on predictive algorithms.** (A) An example depicting the methodology used to design peptides. Immunogenic heat map that recognizes regions with high binding affinity for MHC I (blue letters) and MHC II (area highlighted in red) grooves for antigen, CT45 (brackets indicate the designed peptide sequence). (B) The peptide sequences for different antigens (17–41 mers) were synthesized that consist of overlapping regions for MHC I and MHC II binding. The peptides: 1–18 are designed from antigens that are overexpressed in MM; peptides 19 through 30 were constructed from cancer testis antigens. The list consists of antigens (MUC1 (SEA1,2,3), CD38, FcRH5, RHAMM, SLAMF7, SOX2, XBP(S)1, CT45, MAGEA6, MAGEC1 and NY-ESO-1) that showed more than one region with overlapping MHC I & II hotspots that could be synthesized. To indicate that the peptides are synthesized from the same antigen, the peptides are labelled accordingly (e.g., CD38.1, CD38.2).

| MUC1 Cocktail | Cocktail 1 | Cocktail 3 | Cocktail 4 |
|---------------|------------|------------|------------|
| SEA1          | SEA 1      | SLAMF7.2   | RHAMM 2    |
| SEA2          | MAGEA6.1   | SLAMF7.5   | RHAMM 3    |
| SEA3          | MAGEA6.3   | FcRH5.1    | RHAMM 4    |
|               | CT45.4     | FcRH5.2    | NYESO 1.1  |
|               | SEPT 9.1   | BCMA2      | NYESO 1.2  |

**Supplementary Figure 2: Four peptide cocktails were used for subsequent experiments.** Based on the data obtained following treatment of healthy donor PBMCs with single peptides, four different peptide cocktails were designed to assess the ability of different antigens to co-operatively induce T cell responses from PBMCs isolated from healthy donors or MM patients.

### A

#### Cocktail 1

| HD       | 1   |     | 2   |     | 3   |     | 4   |     | 5   |     |
|----------|-----|-----|-----|-----|-----|-----|-----|-----|-----|-----|
|          | CD4 | CD8 | CD4 | CD8 | CD4 | CD8 | CD4 | CD8 | CD4 | CD8 |
| $T_{EM}$ | 49  | 53  | 52  | 68  | 57  | 50  | 67  | 48  | 100 | 96  |
| $T_{CM}$ | 47  | 42  | 43  | 15  | 41  | 49  | 33  | 49  | 0   | 0   |
|          |     |     |     |     |     |     |     |     |     |     |
| MM       | 1   |     | 2   |     | 3   |     | 4   |     | 5   |     |
|          | CD4 | CD8 | CD4 | CD8 | CD4 | CD8 | CD4 | CD8 | CD4 | CD8 |
| $T_{EM}$ | 77  | 69  | 76  | 76  | 96  | 94  | 60  | 42  | 100 | 97  |
| $T_{CM}$ | 22  | 30  | 23  | 19  | 4   | 3   | 21  | 57  | 0   | 1   |

### B

#### Cocktail 3

| HD       | 1   |     | 2   |     | 3   |     | 4                  |     | 5                  |     |
|----------|-----|-----|-----|-----|-----|-----|--------------------|-----|--------------------|-----|
|          | CD4 | CD8 | CD4 | CD8 | CD4 | CD8 | CD4                | CD8 | CD4                | CD8 |
| $T_{EM}$ | 31  | 64  | 54  | 64  | 56  | 54  | 79                 | 64  | Insufficient Cells |     |
| $T_{CM}$ | 60  | 26  | 36  | 10  | 41  | 44  | 20                 | 34  | Insufficient Cells |     |
|          |     |     |     |     |     |     |                    |     |                    |     |
| MM       | 1   |     | 2   |     | 3   |     | 4                  |     | 5                  |     |
|          | CD4 | CD8 | CD4 | CD8 | CD4 | CD8 | CD4                | CD8 | CD4                | CD8 |
| $T_{EM}$ | 68  | 79  | 90  | 76  | 93  | 89  | Insufficient Cells |     | 100                | 94  |
| $T_{CM}$ | 30  | 19  | 9   | 18  | 7   | 7   | Insufficient Cells |     | 0                  | 1   |

### C

#### Cocktail 4

| HD       | 1   |     | 2   |     | 3   |     | 4                  |     | 5   |     |
|----------|-----|-----|-----|-----|-----|-----|--------------------|-----|-----|-----|
|          | CD4 | CD8 | CD4 | CD8 | CD4 | CD8 | CD4                | CD8 | CD4 | CD8 |
| $T_{EM}$ | 42  | 52  | 57  | 72  | 61  | 24  | 74                 | 45  | 37  | 47  |
| $T_{CM}$ | 51  | 42  | 33  | 12  | 37  | 75  | 25                 | 51  | 0   | 0   |
|          |     |     |     |     |     |     |                    |     |     |     |
| MM       | 1   |     | 2   |     | 3   |     | 4                  |     | 5   |     |
|          | CD4 | CD8 | CD4 | CD8 | CD4 | CD8 | CD4                | CD8 | CD4 | CD8 |
| $T_{EM}$ | 78  | 57  | 83  | 70  | 92  | 84  | Insufficient Cells |     | 100 | 96  |
| $T_{CM}$ | 22  | 42  | 16  | 23  | 7   | 13  | Insufficient Cells |     | 0   | 1   |

**Supplementary Figure 3: Culture activation generates  $T_{EM}$  and  $T_{CM}$  populations in both  $CD4^+$  and  $CD8^+$  T cells.** Table depicting the percentage of  $T_{EM}$  and  $T_{CM}$  for  $CD4^+$  and  $CD8^+$  T cells obtained at the end of the culture period following treatment with cocktails (A) CT1, (B) CT3 and (C) CT4.

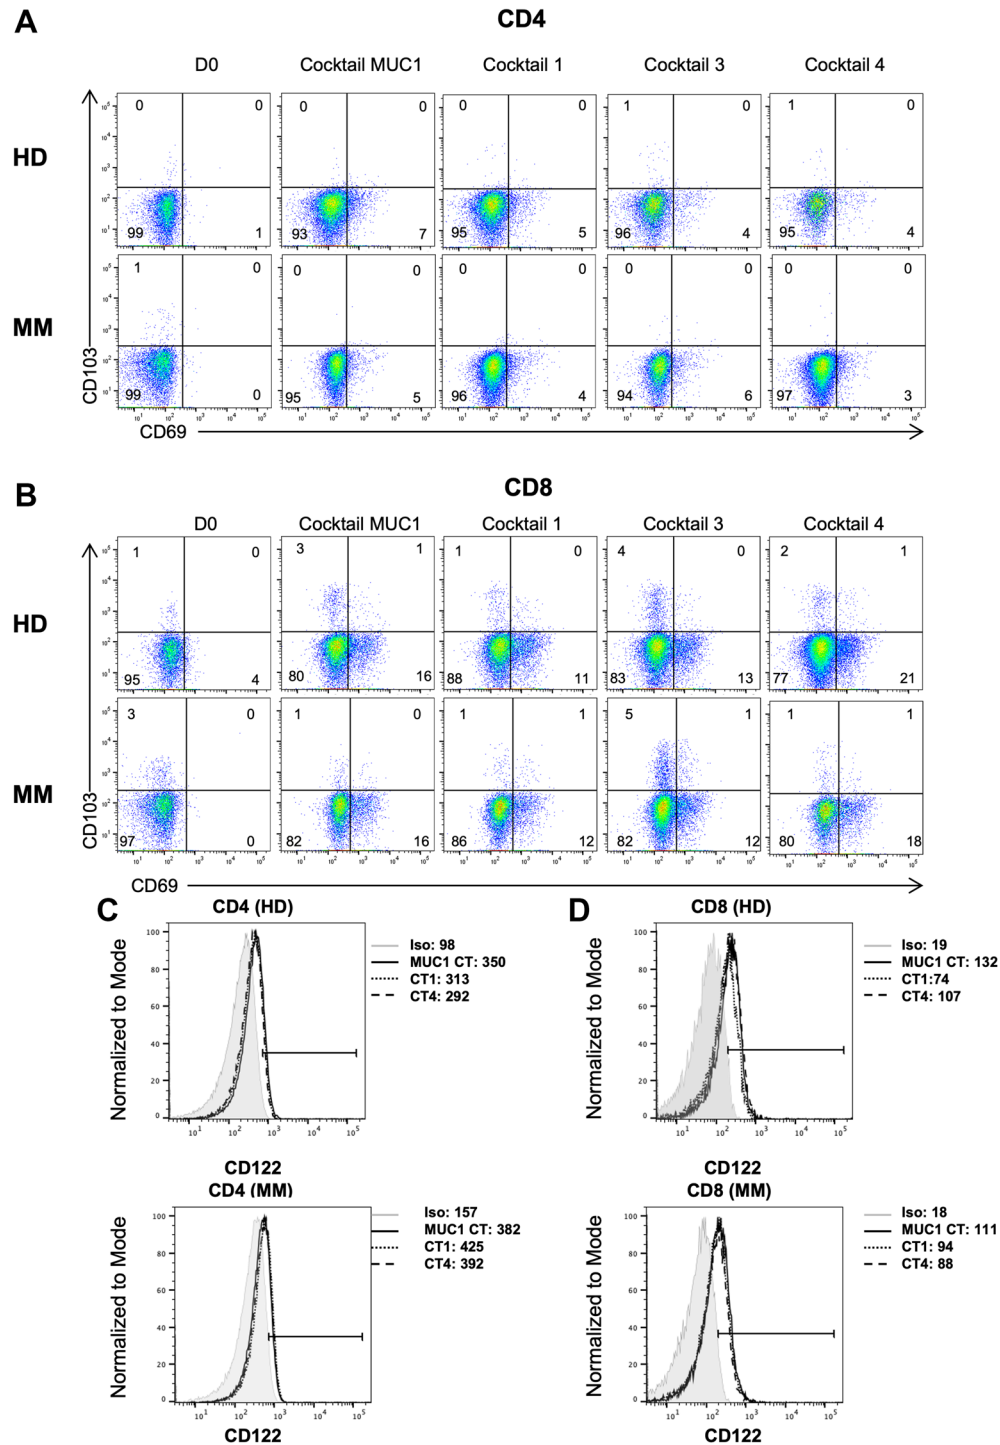

**Supplementary Figure 4: Stimulation with peptide cocktail leads to enhanced expression of  $T_{RM}$  markers, CD69 and CD103, on CD4<sup>+</sup> and CD8<sup>+</sup> T cells.** (A) Expression of CD69 and CD103 on CD4<sup>+</sup> T cells or (B) CD8<sup>+</sup> T cells on D0 or on D19 following stimulation of PBMCs isolated from healthy donor (HD) or MM patient (MM) with either MUC1 Cocktail, Cocktail 1, Cocktail 3 or Cocktail 4. Representative data are shown. CD122 expression on CD4<sup>+</sup> T cells (C) and CD8<sup>+</sup> T cells (D) were generated following exposure of PBMCs from HD (top panel) and MM patient (bottom panel) to MUC1 cocktail (solid line histogram), Cocktail 1 (dotted line histogram), and Cocktail 4 (dashed line histogram). The isotype control is depicted by grey histogram. Data representative of four individuals (2 HDs, 2 MM patients).

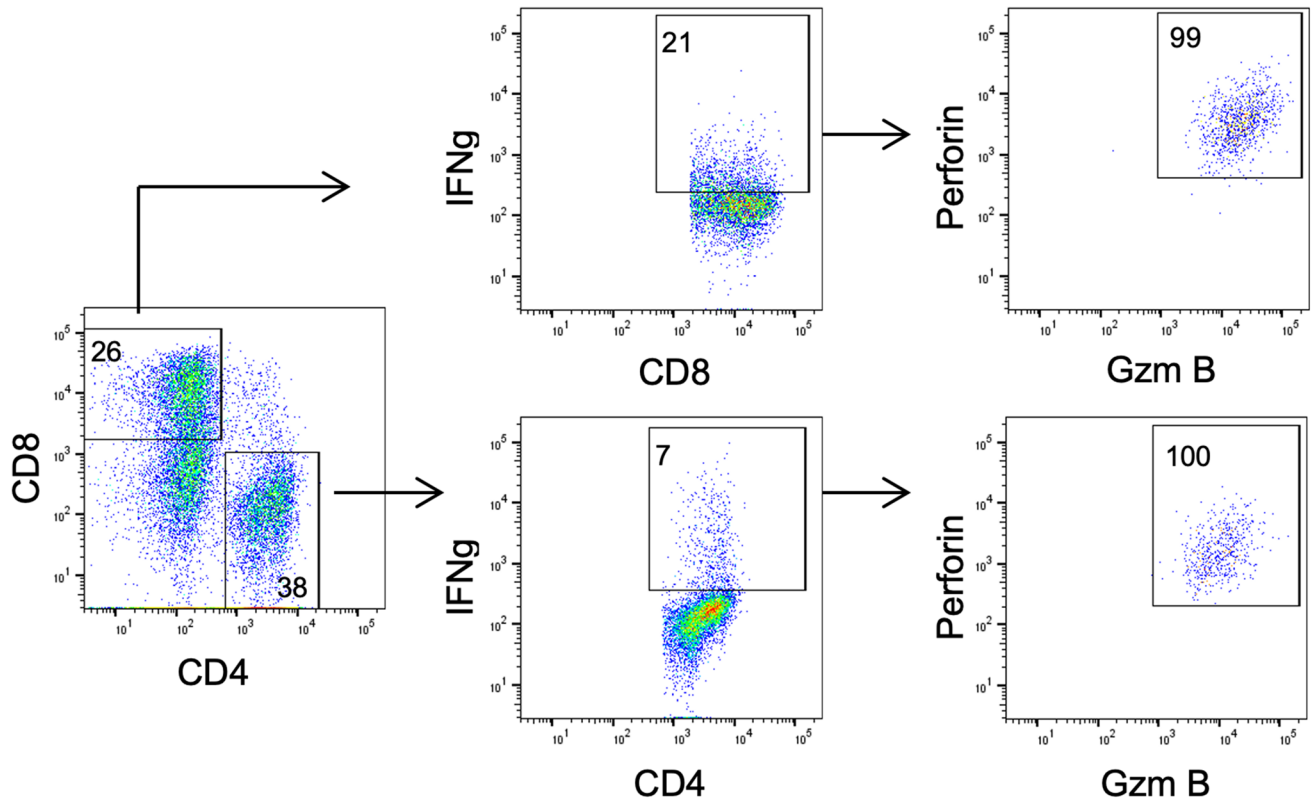

**Supplementary Figure 5: Effector memory ( $T_{EM}$ ) and central memory ( $T_{CM}$ ) CD4<sup>+</sup> and CD8<sup>+</sup> T cells possess anti-tumor profile.** Representative dot plot showing the gating hierarchy to define different functional subsets of CD4<sup>+</sup> and CD8<sup>+</sup> T cells. First, viable cells were gated based on the absence of UV Blue stain. These cells are then gated on CD3 and then on CD8, which was used to define CD8<sup>+</sup>IFN- $\gamma$ <sup>+</sup>. The expression of perforin and granzyme B was examined on CD8<sup>+</sup>IFN- $\gamma$ <sup>+</sup>. Similar strategy was used for CD4<sup>+</sup> T cells. Representative data are shown.
